# Supplementary material
Source: PubMed Central journal article supplement (PMC4439182)
Supplement: NIHMS688836-supplement-Supplement.pdf [file NIHMS688836-supplement-Supplement.pdf]

## Supplementary Online Content

Donohue MC, Sperling RA, Salmon DP, et al; Australian Imaging, Biomarkers, and Lifestyle Flagship Study of Ageing; the Alzheimer's Disease Neuroimaging Initiative; and the Alzheimer's Disease Cooperative Study. The Preclinical Alzheimer Cognitive Composite: measuring amyloid-related decline. *JAMA Neurol*. Published online June 2, 2014. doi:10.1001/jamaneurol.2014.803.

**eAppendix.** CDR-SB and ADCS-PACC items

**eTable.** MMRM estimates of IRT latent ability change from baseline for ADNI A $\beta$ + (n=36) vs A $\beta$ - (n=59) normal controls

**eFigure.** MMRM estimates of IRT latent ability change from baseline

### eReferences

This supplementary material has been provided by the authors to give readers additional information about their work.

## eAppendix

### CDR-SB and ADCS-PACC items

Based on ADNI A $\beta$  group data, we would have 80 to 90% power to detect  $\Delta=0.328$  to  $0.380$  Delayed Word Recall points (110 to 127% A $\beta$  difference),  $\Delta=0.789$  to  $0.912$  Logical Memory IIa points (140 to 162% A $\beta$  difference),  $\Delta=1.44$  to  $1.66$  Digit-Symbol Substitution points (66.2 to 76.3% of the month 24 A $\beta$  difference),  $\Delta=0.312$  to  $0.361$  MMSE points (38.1 to 44.0% of the month 24 A $\beta$  difference), and  $\Delta=0.151$  to  $0.174$  CDR-SB points (45.1 to 52.3% A $\beta$  difference).

Based on AIBL A $\beta$  group data, we would have 80 to 90% power to detect  $\Delta=0.485$  to  $0.561$  List A Delayed Recall points (29.5 to 34.1% A $\beta$  difference),  $\Delta=0.673$  to  $0.778$  Logical Memory IIa points (30.3 to 35.0% A $\beta$  difference),  $\Delta=1.67$  to  $1.93$  Digit-Symbol Substitution points (392 to 454% A $\beta$  difference),  $\Delta=0.267$  to  $0.309$  MMSE points (85.7 to 99.1% A $\beta$  difference). CDR-SB was not available.

Based on ADCS-PI CDR-G Progressor group data, we would have 80 to 90% power to detect  $\Delta=1.12$  to  $1.30$  FCSRT Total Recall points (14.4 to 16.7% CDR-G difference),  $\Delta=0.618$  to  $0.713$  Logical Memory IIa points (14.7 to 17.0% CDR-G difference),  $\Delta=2.20$  to  $2.54$  Digit-Symbol Substitution points (19.5 to 22.6% CDR-G difference),  $\Delta=1.80$  to  $2.08$  3MSE points (28.4 to 32.8% CDR-G difference). CDR-SB was only collected in ADCS-PI after decline was observed at annual visits.

Based on ADCS-PI *APOE*- $\epsilon 4$  group data, we would have 80 to 90% power to detect  $\Delta=1.23$  to  $1.42$  FCSRT Total Recall points (127 to 147% *APOE*- $\epsilon 4$  difference),  $\Delta=0.647$  to  $0.748$  Logical Memory IIa points (52.9 to 61.2% *APOE*- $\epsilon 4$  difference),  $\Delta=2.31$  to  $2.67$  Digit-Symbol Substitution points (134 to 155% A $\beta$  difference),  $\Delta=2.05$  to  $2.37$  3MSE points (81.0 to 93.5% *APOE*- $\epsilon 4$  difference).

### Reweighting the ADCS-PACC items with logistic regression

To explore re-weighting the items of the ADCS-PACC to improve power, we fit a logistic model of AIBL A $\beta$  status at month 36 with ADCS-PACC item change Z-scores as covariates. The regression coefficients from this model provide a weighting tuned to predict A $\beta$  status. The resulting weights favored List A Delayed Recall and Logical Memory (55.0% List A Delayed Recall, 34.7% Logical Memory, 5.7% MMSE, and 4.6% Digit Symbol Substitution).

We see very variable results when the AIBL-derived logistic regression weights are applied across the studies. With the equal (vs. logistic regression) weighted ADCS-PACC we have 80% power to detect 33.3% (vs. 26.8%) of the AIBL A $\beta$  group difference at month 36, 14.4% (vs. 14.9%) of the ADCS-PI CDR-G Progressor difference, and 47.9% (vs. 94.7%) of the ADCS-PI *APOE*- $\epsilon 4$  difference. In ADNI, the A $\beta$  group difference in the logistics regression re-weighted ADCS-PACC is not significant at any time point. We were able to further optimize the weighting to minimize the AIBL A $\beta$  group difference from 26.8% down to 25.3% using Nelder-Mead<sup>1</sup> optimization, but the solution entailed weighting Digit Symbol Substitution in the wrong direction (47.7% List A Delayed Recall, 54.1% Logical Memory, 5.8% MMSE, and -7.7% Digit Symbol Substitution).

### Item Response Theory analysis

To further explore re-weighting, we applied an Item Response Theory (IRT) approach<sup>2</sup> to all of the items of the ADNI neurological assessment battery. We trained the IRT model using data from N=322 ADNI normal control subjects with unknown A $\beta$  status, then tested the IRT-derived latent ability on the N=97 ADNI normal control subject with known A $\beta$  status. We derived two IRT measures of latent ability (1) based on the ADCS-PACC items alone and (2) based on the top 16 items from the complete ADNI battery (using a total information score threshold of 2.5). The top 16 items identified by this method were:

CDR-Global, ADAS-Cog Constructional Praxis, ADAS-Cog Number Cancellation, CDR-Memory, CDR-Judgment, Clock Drawing, Clock Copying, Auditory Verbal Learning Test (AVLT) 30 Minute Delay, Functional Activities Questionnaire (TV program, book, or magazine), ADAS-Cog Naming Objects and Fingers, AVLT Trial 6 Total, Digit Span Forward, ADAS-Cog Delayed Word Recall, Logical Memory Total Story Units Recalled, AVLT Total Intrusions, ADAS-Cog Word-finding Difficulty. The eFigure shows the MMRM estimated mean change from baseline for the two IRT latent ability outcomes and the eTable provides the estimates.

The 16-item latent ability score has 80 to 90% power to detect a treatment effects as small as  $\Delta=0.435$  to 0.503 points (43.5 to 50.3% of the  $A\beta$  group difference at month 36) assuming 5% two-sided alpha, and 30% dropout. The ADCS-PACC latent ability score has 80 to 90% power to detect effects as small as  $\Delta=0.262$  to 0.303 points (46.0 to 53.3% of the  $A\beta$  group difference at month 24).

We see little or no improvement over the equal weight version of the ADCS-PACC with respect to discrimination and power. With the equal (vs. IRT) weighted version of the ADCS-PACC we have 80% power to detect 42.4% (vs. 46.0%) of the ADNI  $A\beta$  group difference at month 24. The IRT re-weighting does marginally worse. The 16 item latent ability score has 80% power to detect 43.5% of the  $A\beta$  group difference at *month 36* and demonstrates a more consistent widening of the gap between ADNI  $A\beta$  groups relative to the ADCS-PACC.

**eTable. MMRM estimates of IRT latent ability change from baseline for ADNI A $\beta$ + (n=36) vs A $\beta$ - (n=59) normal controls.**

| IRT latent ability from top 16 items    |             |    |          |       |              |          |        |        |       |       |
|-----------------------------------------|-------------|----|----------|-------|--------------|----------|--------|--------|-------|-------|
| Month                                   | Group       | N  | Estimate | SE    | p-value      | p-value* | lower  | upper  | sigma | rho   |
| 6                                       | A $\beta$ - | 59 | -0.249   | 0.159 | 0.117        |          | -0.560 | 0.062  |       |       |
|                                         | A $\beta$ + | 36 | -0.257   | 0.208 | 0.219        |          | -0.665 | 0.152  |       |       |
|                                         | Difference  |    | -0.008   | 0.265 | 0.977        | 1.000    | -0.527 | 0.511  | 1.213 |       |
| 12                                      | A $\beta$ - | 58 | -0.167   | 0.188 | 0.376        |          | -0.535 | 0.202  |       |       |
|                                         | A $\beta$ + | 35 | -0.347   | 0.247 | 0.161        |          | -0.830 | 0.137  |       |       |
|                                         | Difference  |    | -0.180   | 0.313 | 0.564        | 0.950    | -0.793 | 0.432  | 1.430 |       |
| 24                                      | A $\beta$ - | 53 | -0.296   | 0.219 | 0.177        |          | -0.724 | 0.132  |       |       |
|                                         | A $\beta$ + | 34 | -0.700   | 0.279 | 0.012        |          | -1.247 | -0.154 |       |       |
|                                         | Difference  |    | -0.405   | 0.356 | 0.257        | 0.639    | -1.102 | 0.293  | 1.609 |       |
| 36                                      | A $\beta$ - | 52 | -0.427   | 0.290 | 0.142        |          | -0.996 | 0.142  |       |       |
|                                         | A $\beta$ + | 27 | -1.426   | 0.398 | <0.001       |          | -2.206 | -0.646 |       |       |
|                                         | Difference  |    | -0.999   | 0.494 | <b>0.044</b> | 0.144    | -1.967 | -0.031 | 2.123 | 0.413 |
| Area between curves                     |             |    | 12.5     | 8.81  | 0.160        |          |        |        |       |       |
| IRT latent ability from ADCS-PACC items |             |    |          |       |              |          |        |        |       |       |
| Month                                   | Group       | N  | Estimate | SE    | p-value      | p-value* | lower  | upper  | sigma | rho   |
| 6                                       | A $\beta$ - | 59 | 0.025    | 0.158 | 0.876        |          | -0.286 | 0.335  |       |       |
|                                         | A $\beta$ + | 36 | -0.119   | 0.206 | 0.564        |          | -0.523 | 0.285  |       |       |
|                                         | Difference  |    | -0.144   | 0.262 | 0.583        | 0.961    | -0.656 | 0.369  | 1.214 |       |
| 12                                      | A $\beta$ - | 58 | 0.462    | 0.168 | 0.006        |          | 0.134  | 0.791  |       |       |
|                                         | A $\beta$ + | 35 | -0.013   | 0.219 | 0.954        |          | -0.442 | 0.416  |       |       |
|                                         | Difference  |    | -0.475   | 0.277 | 0.087        | 0.276    | -1.018 | 0.068  | 1.276 |       |
| 24                                      | A $\beta$ - | 53 | 0.452    | 0.169 | 0.008        |          | 0.121  | 0.784  |       |       |
|                                         | A $\beta$ + | 34 | -0.117   | 0.216 | 0.589        |          | -0.539 | 0.306  |       |       |
|                                         | Difference  |    | -0.569   | 0.275 | <b>0.040</b> | 0.134    | -1.108 | -0.029 | 1.244 |       |
| 36                                      | A $\beta$ - | 52 | 0.199    | 0.174 | 0.255        |          | -0.143 | 0.540  |       |       |
|                                         | A $\beta$ + | 27 | 0.048    | 0.241 | 0.841        |          | -0.424 | 0.521  |       |       |
|                                         | Difference  |    | -0.150   | 0.298 | 0.615        | 0.971    | -0.735 | 0.435  | 1.272 | 0.364 |
| Area between curves                     |             |    | 12.9     | 6.71  | 0.055        |          |        |        |       |       |

The models assume heterogeneous compound symmetric covariance structure, which allows different variance parameters (sigma) per visit, and a single correlation parameter (rho). The IRT model was trained on the N=322 ADNI normal controls with unknown A $\beta$  status, and tested using N=97 ADNI normal controls known A $\beta$  status. The top 16 ADNI items were selected based on a threshold of 2.5 applied to total information scores.

SE = Standard Error; p-value\* = p-value adjusted for model-based simultaneous inference; lower = 95% confidence interval lower limit; upper = 95% confidence interval upper limit; sigma = residual standard deviation estimate at each visit; rho = estimated correlation between visits.

**eFigure. MMRM estimates of IRT latent ability change from baseline.**

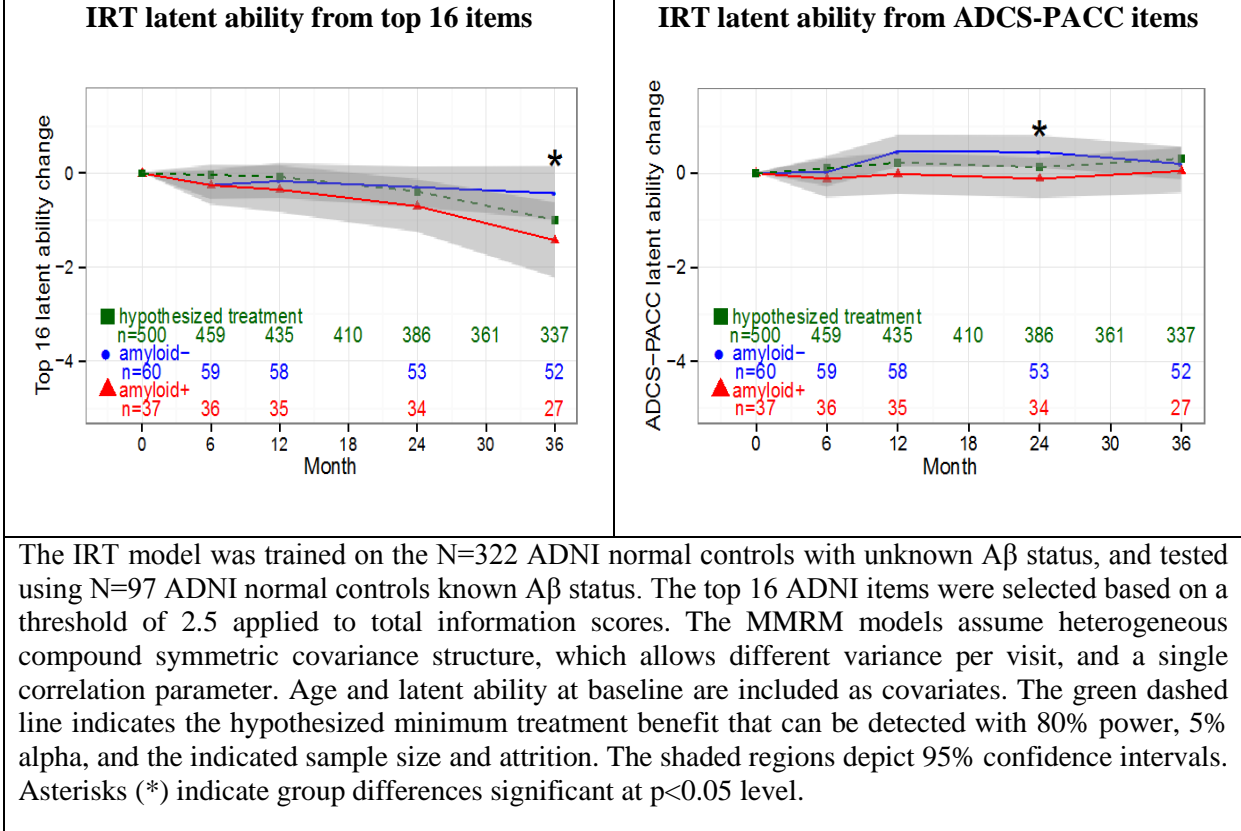

## eReferences

1. Nelder JA, Mead R. A simplex method for function minimization. *The Computer Journal*. 1965;7(4):308-313. doi: 10.1093/comjnl/7.4.308.
2. Rizopoulos D. ltm: An R package for latent variable modeling and item response analyses. *Journal of Statistical Software*. 2006;17(5):1-25.
